# Supplementary material for: Mental health-related conversations on social media and crisis episodes: a time-series regression analysis
Source: PubMed Central journal article supplement (PMC7005283; doi:10.1038/s41598-020-57835-9), 2020-02-06
Supplement: 41598_2020_57835_MOESM1_ESM.pdf [file 41598_2020_57835_MOESM1_ESM.pdf]

Mental health-related conversations on social media and crisis episodes: a time-series regression analysis.

Anna Kolliakou, Ioannis Bakolis, David Chandran, Leon Derczynski, Nomi Werbeloff, David PJ Osborn, Kalina Bontcheva, Robert Stewart

| Tweet group              | Number (%) of weeks with a given number of days containing above-median numbers of tweets |           |           |           |           |           |           |            |
|--------------------------|-------------------------------------------------------------------------------------------|-----------|-----------|-----------|-----------|-----------|-----------|------------|
|                          | 0 days                                                                                    | 1 day     | 2 days    | 3 days    | 4 days    | 5 days    | 6 days    | 7 days     |
| General depression       | 99 (38.1)                                                                                 | 14 (5.4)  | 6 (2.3)   | 10 (3.8)  | 10 (3.8)  | 8 (3.1)   | 10 (3.8)  | 103 (39.6) |
| General schizophrenia    | 70 (26.9)                                                                                 | 32 (12.3) | 17 (6.5)  | 14 (5.4)  | 14 (5.4)  | 17 (6.5)  | 21 (8.1)  | 75 (28.8)  |
| Supportive depression    | 19 (7.3)                                                                                  | 28 (10.8) | 38 (14.6) | 34 (13.1) | 42 (16.2) | 33 (12.7) | 27 (10.4) | 39 (15.0)  |
| Supportive schizophrenia | 76 (29.2)                                                                                 | 71 (27.3) | 43 (16.5) | 23 (8.8)  | 13 (5.0)  | 25 (9.6)  | 5 (1.9)   | 4 (1.5)    |

**Supplementary Table 1.** Distribution of days with above-median mental health-related tweets for 260 analysed weeks between 01/01/2010 and 31/12/2014.

| Day of the week | median (IQR)         |                                            |                                              |                                               |                                                  |
|-----------------|----------------------|--------------------------------------------|----------------------------------------------|-----------------------------------------------|--------------------------------------------------|
|                 | SLAM crisis episodes | General depression tweets (per 10 million) | General schizophrenia tweets (per 1 billion) | Supportive depression tweets (per 10 billion) | Supportive schizophrenia tweets (per 10 billion) |
| Monday          | 28 (5-65)            | 6 (0-23)                                   | 9 (0-54)                                     | 1 (0-112)                                     | 0 (0-11)                                         |
| Tuesday         | 32 (7-50)            | 7 (0-18)                                   | 11 (0-151)                                   | 1 (0-129)                                     | 0 (0-14)                                         |
| Wednesday       | 31 (7-50)            | 5 (0-49)                                   | 11 (0-114)                                   | 2 (0-295)                                     | 0 (0-19)                                         |
| Thursday        | 32 (7-68)            | 6 (0-23)                                   | 10 (0-70)                                    | 2 (0-65)                                      | 0 (0-29)                                         |
| Friday          | 35 (11-56)           | 5 (0-21)                                   | 10 (0-53)                                    | 0 (0-38)                                      | 0 (0-10)                                         |
| Saturday        | 16 (4-35)            | 6 (0-16)                                   | 9 (0-67)                                     | 0 (0-27)                                      | 0 (0-11)                                         |
| Sunday          | 11 (3-21)            | 6 (0-39)                                   | 8 (0-69)                                     | 0 (0-57)                                      | 0 (0-10)                                         |

**Supplementary Table 2.** Descriptive data for SLAM outcome and exposures by day of the week between Jan 1<sup>st</sup> 2010 and Dec 31<sup>st</sup> 2014.

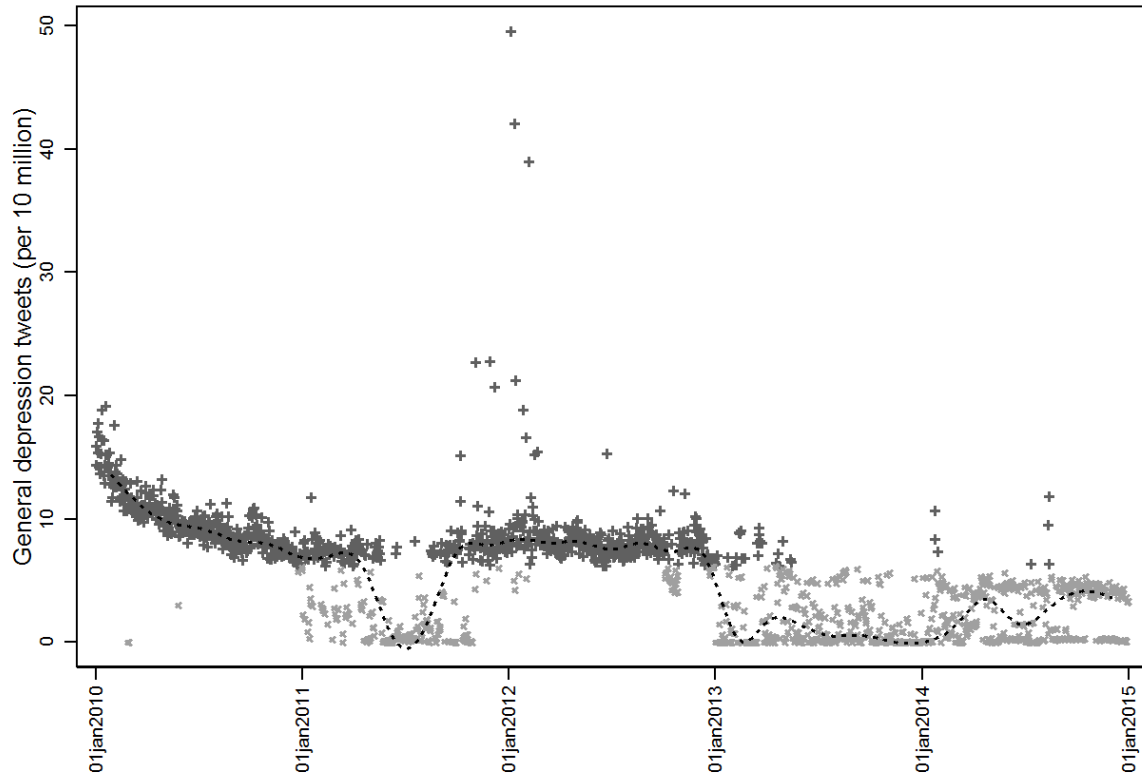

**Supplementary Figure 1.** Distribution of general depression tweets between 2010 and 2015.

+ above-median tweet day

- below-median tweet day

- - - trend line

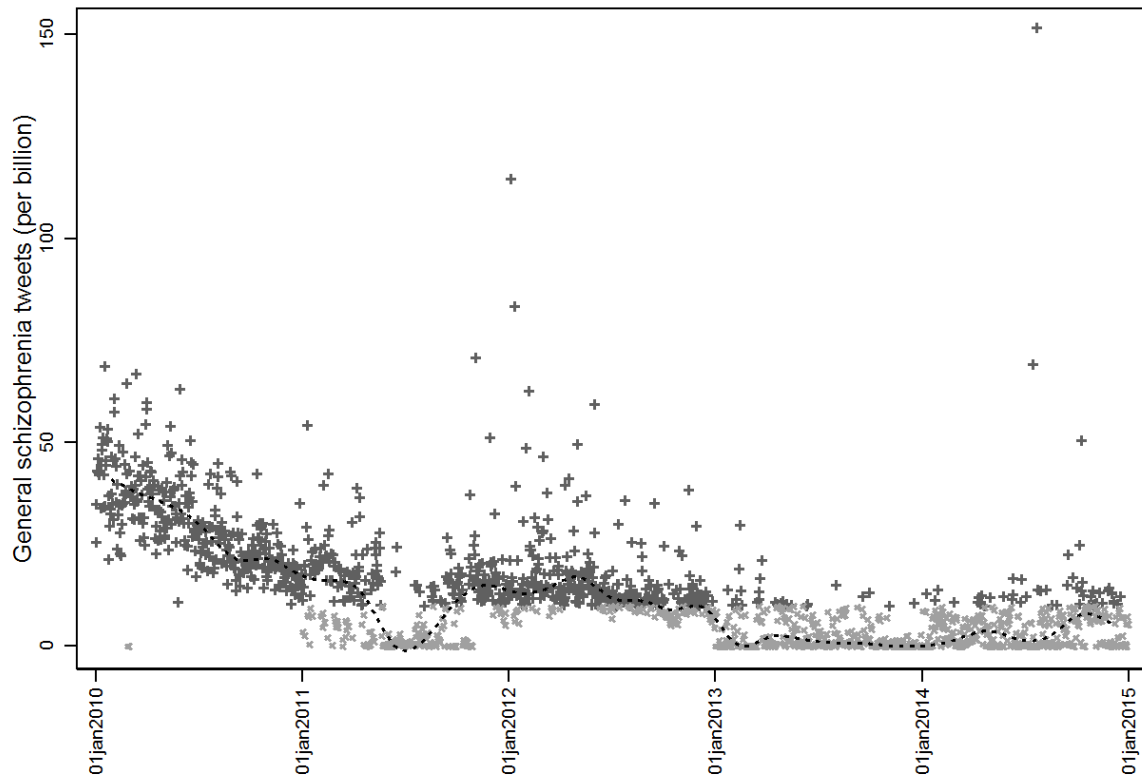

**Supplementary Figure 2.** Distribution of general schizophrenia tweets between 2010 and 2015.

+ above-median tweet day

- below-median tweet day

- - - trend line

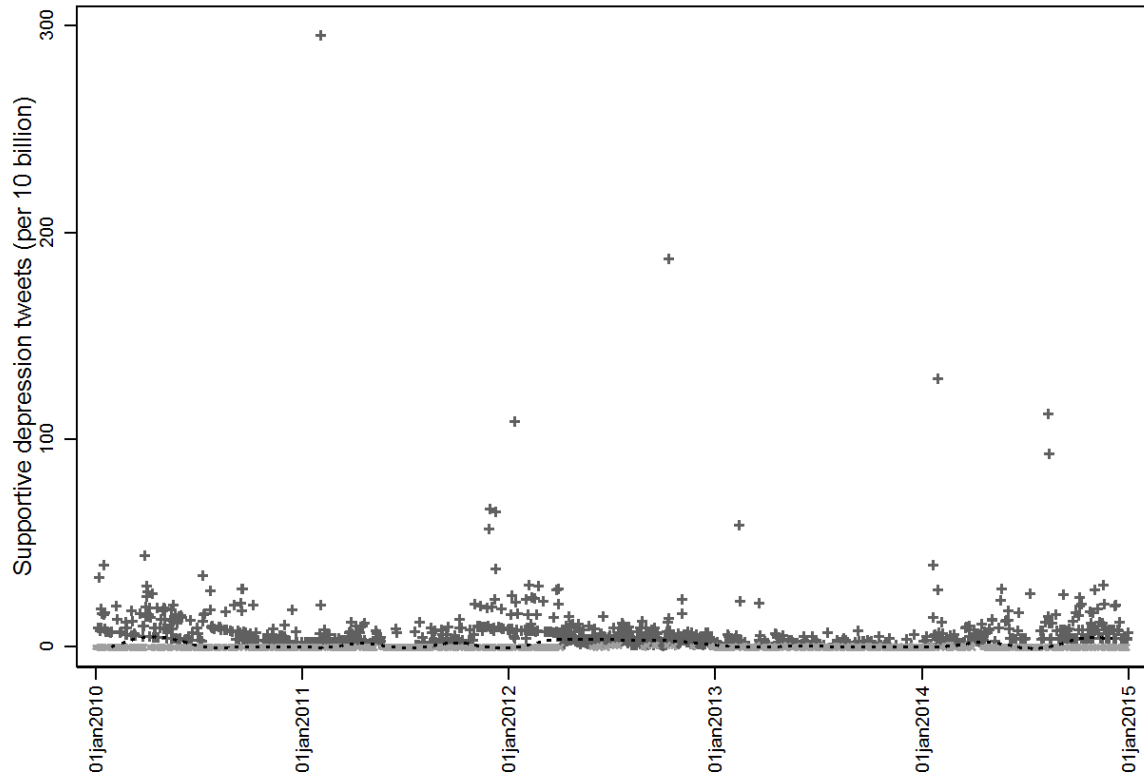

**Supplementary Figure 3.** Distribution of supportive depression tweets between 2010 and 2015.

+ above-median tweet day

- below-median tweet day

--- trend line



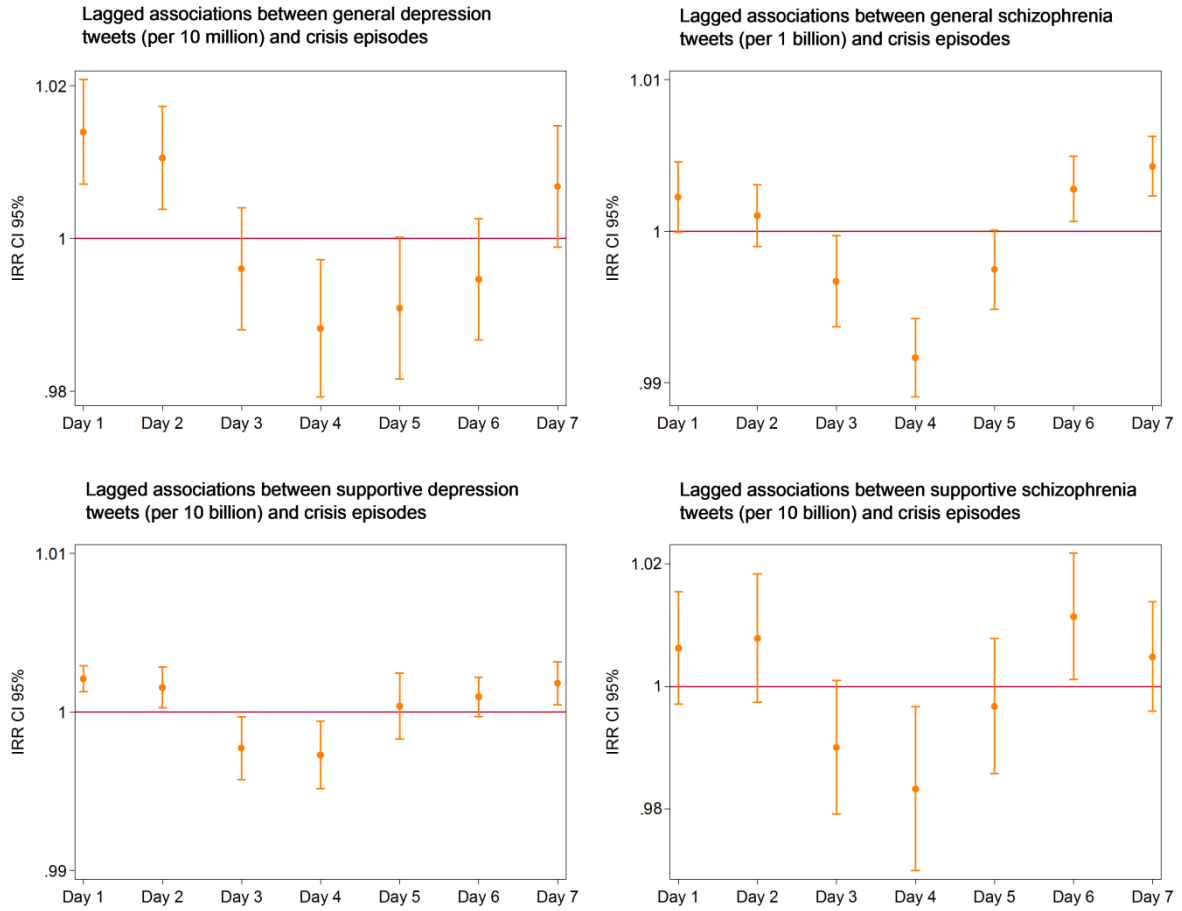

**Supplementary Figure 5.** Lagged associations between mental health tweets and C&I crisis episodes adjusted for autocorrelation, year, temperature and seasonality. The horizontal axis represents the associations lagged over a 7-day period and the vertical axis represents the Relative Risks (RR) with 95% confidence intervals (CI).



| <b>Tweet group</b>                                                                                                                                                                                                                                                                                                                                                                      | <b>Unadjusted</b>                   | <b>Adjusted<br/>Year</b>            | <b>Adjusted<br/>Year<br/>Temperature</b> | <b>Adjusted<br/>Year<br/>Temperature<br/>Occupancy<sup>^</sup></b> | <b>Adjusted<br/>Year<br/>Temperature<br/>Occupancy<sup>^</sup><br/>Seasonality</b> |
|-----------------------------------------------------------------------------------------------------------------------------------------------------------------------------------------------------------------------------------------------------------------------------------------------------------------------------------------------------------------------------------------|-------------------------------------|-------------------------------------|------------------------------------------|--------------------------------------------------------------------|------------------------------------------------------------------------------------|
|                                                                                                                                                                                                                                                                                                                                                                                         |                                     |                                     |                                          |                                                                    |                                                                                    |
| <b>SLaM</b>                                                                                                                                                                                                                                                                                                                                                                             | <b>RR(95% CI)</b>                   | <b>RR(95% CI)</b>                   | <b>RR(95% CI)</b>                        | <b>RR(95% CI)</b>                                                  | <b>RR(95% CI)</b>                                                                  |
| General depression <sup>1</sup>                                                                                                                                                                                                                                                                                                                                                         | 1.003 <sup>-</sup><br>(0.999-1.007) | 1.006**<br>(1.000-1.012)            | 1.007**<br>(1.001-1.013)                 | 1.007**<br>(1.001-1.013)                                           | 1.008**<br>(1.002-1.014)                                                           |
| General schizophrenia <sup>2</sup>                                                                                                                                                                                                                                                                                                                                                      | 1.003**<br>(1.002-1.004)            | 1.005**<br>(1.003-1.008)            | 1.006**<br>(1.004-1.008)                 | 1.006**<br>(1.003-1.008)                                           | 1.006**<br>(1.004-1.008)                                                           |
| Supportive depression <sup>3</sup>                                                                                                                                                                                                                                                                                                                                                      | 1.002**<br>(1.001-1.003)            | 1.002**<br>(1.001-1.003)            | 1.002**<br>(1.001-1.003)                 | 1.002**<br>(1.001-1.004)                                           | 1.003**<br>(1.001-1.004)                                                           |
| Supportive schizophrenia <sup>4</sup>                                                                                                                                                                                                                                                                                                                                                   | 1.014**<br>(1.006-1.021)            | 1.014**<br>(1.006-1.022)            | 1.014**<br>(1.007-1.022)                 | 1.014**<br>(1.007-1.022)                                           | 1.015**<br>(1.007-1.023)                                                           |
|                                                                                                                                                                                                                                                                                                                                                                                         |                                     |                                     |                                          |                                                                    |                                                                                    |
| <b>C&amp;I</b>                                                                                                                                                                                                                                                                                                                                                                          | <b>RR(95% CI)</b>                   | <b>RR(95% CI)</b>                   | <b>RR(95% CI)</b>                        | <b>RR(95% CI)</b>                                                  | <b>RR(95% CI)</b>                                                                  |
| General depression <sup>1</sup>                                                                                                                                                                                                                                                                                                                                                         | 1.000 <sup>-</sup><br>(0.993-1.003) | 1.006 <sup>-</sup><br>(0.999-1.013) | 1.008*<br>(1.001-1.015)                  | As previous<br>step                                                | 1.008**<br>(1.001-1.015)                                                           |
| General schizophrenia <sup>2</sup>                                                                                                                                                                                                                                                                                                                                                      | 1.003**<br>(1.002-1.004)            | 1.006**<br>(1.003-1.008)            | 1.006**<br>(1.003-1.008)                 | As previous<br>step                                                | 1.006**<br>(1.004-1.008)                                                           |
| Supportive depression <sup>3</sup>                                                                                                                                                                                                                                                                                                                                                      | 1.002**<br>(1.001-1.003)            | 1.002**<br>(1.001-1.004)            | 1.002**<br>(1.001-1.004)                 | As previous<br>step                                                | 1.003**<br>(1.001-1.004)                                                           |
| Supportive schizophrenia <sup>4</sup>                                                                                                                                                                                                                                                                                                                                                   | 1.014**<br>(1.006-1.021)            | 1.014**<br>(1.007-1.022)            | 1.014**<br>(1.007-1.022)                 | As previous<br>step                                                | 1.015**<br>(1.007-1.023)                                                           |
| <p>Relative risk (RR) and 95% confidence intervals (CI) represent an increased risk of crisis episodes per unit increase in tweet volume</p> <p>- not significant</p> <p>* p&lt;0.001</p> <p>** p&lt;0.005</p> <p><sup>^</sup> SLAM-only</p> <p><sup>1</sup> per 10 million</p> <p><sup>2</sup> per 1 billion</p> <p><sup>3</sup> per 10 billion</p> <p><sup>4</sup> per 10 billion</p> |                                     |                                     |                                          |                                                                    |                                                                                    |

**Supplementary Table 3.** Confounder adjustment process in the concurrent unadjusted and adjusted associations between daily tweet volumes and daily crisis episodes in SLAM and C&I.

| <b>Tweet content</b>     | <b>SLAM Crisis Episodes</b> |                |
|--------------------------|-----------------------------|----------------|
|                          | <b>RR (95% CI)</b>          | <b>P value</b> |
| General depression       | 1.04 (0.98-1.11)            | 0.181          |
| General schizophrenia    | 1.15 (1.10-1.21)            | <0.001         |
| Supportive depression    | 1.09 (1.05-1.14)            | <0.001         |
| Supportive schizophrenia | 1.10 (1.06-1.15)            | <0.001         |

Adjusted for autocorrelation, year, temperature, seasonality and occupancy level

**Supplementary Table 4.** Adjusted associations between above-median tweet volume days and daily crisis episodes.

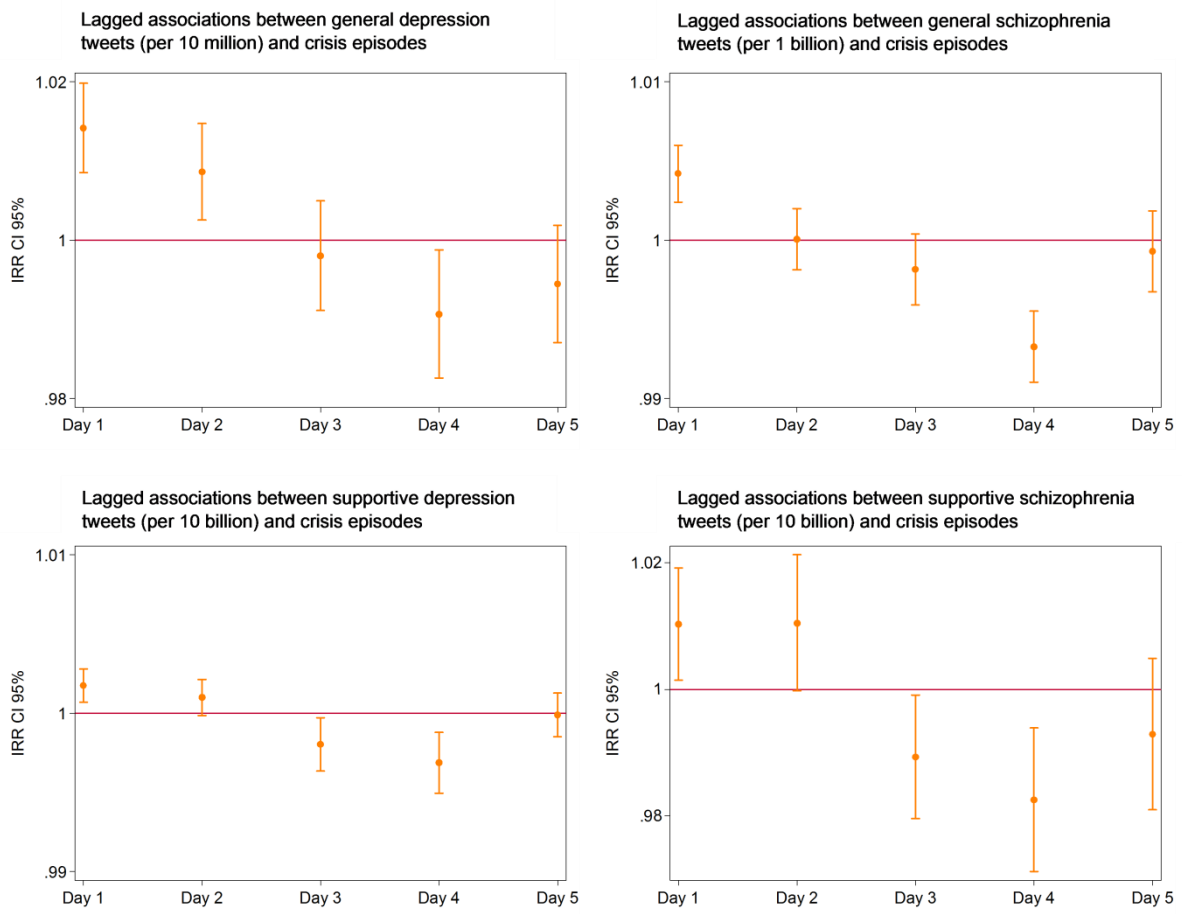

**Supplementary Figure 6.** Lagged associations between mental health tweets and SLAM crisis episodes adjusted for autocorrelation, year, temperature, seasonality and occupancy level. The horizontal axis represents the associations lagged over a 5-day period and the vertical axis represents the Relative Risks (RR) with 95% confidence intervals (CI).

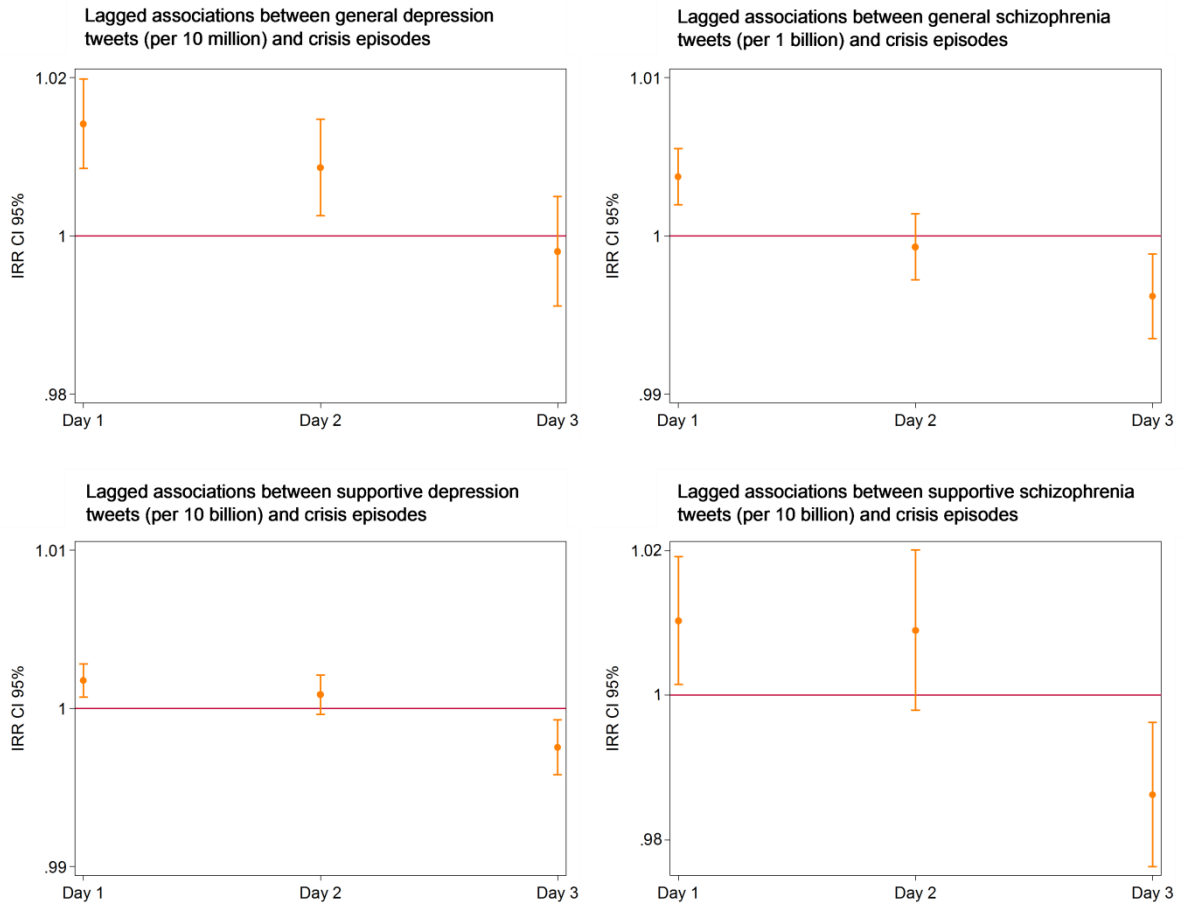

**Supplementary Figure 7.** Delayed associations between mental health tweets and SLAM crisis episodes adjusted for autocorrelation, year, temperature, seasonality and occupancy level. The horizontal axis represents the associations lagged over a 3-day period and the vertical axis represents the Relative Risks (RR) with 95% confidence intervals (CI).

| <b>Tweet group</b>       | <b>Twitter peak</b>      | <b>Google Trends peak</b>         |
|--------------------------|--------------------------|-----------------------------------|
| General depression       | 04/01/2012<br>11/01/2012 | 01-07/01/2012                     |
| General schizophrenia    | 04/01/2012<br>22/07/2014 | 25-31/12/2011<br>20-26/07/2014    |
| Supportive depression    | 02/02/2011<br>10/10/2012 | 22-29/01/11<br>7-14/10/2012       |
| Supportive schizophrenia | 03/11/2011<br>27/05/2014 | 30/10-05/11/2011<br>25-31/05/2014 |

**Supplementary Table 5.** Twitter peaks and corresponding news search peaks in Google Trends between 01/01/2010 and 01/01/2015.

| <b>Search group</b> | <b>Keywords</b>                                                                                                              |
|---------------------|------------------------------------------------------------------------------------------------------------------------------|
| Depression          | depress[a-z0-9]*                                                                                                             |
| Schizophrenia       | schizophren[a-z0-9]*,<br>schizoaffective,<br>schizo affective,<br>schizo_affective,<br>schizo-affective,<br>#schizo[a-z0-9]* |
| Stigma              | #mentalillness,<br>#endstigma,<br>#stigma,<br>#whatstigma,<br>#mhstigma,<br>#stigmahurts,<br>#mentalhealth[a-z0-9]*          |

**Supplementary Table 6.** Keywords used to search the Twitter API for depression, schizophrenia and mental health stigma-related posts.
